# Supplementary material for: Assessing Barriers Encountered by Women in Cervical Cancer Screening and Follow-Up Care in Urban Bolivia, Cochabamba
Source: MDPI journal article supplement (doi:10.3390/healthcare10091604), 2022-08-24
Supplement: s1 [file s1]

**En el marco de un estudio realizado en cooperación entre la Universidad Libre de Bruselas y la Universidad Mayor de San Simón, estamos realizando un estudio para aumentar los conocimientos sobre las prácticas de seguimiento del Virus del Papiloma Humano, en la región de Cochabamba. El objetivo de este estudio es, de comprender las posibles diferencias y las barreras que podría enfrentar el personal en el seguimiento de sus pacientes.**

**Todas las informaciones dadas en este cuestionario serán completamente anónimas, confidenciales y utilizadas únicamente en el marco de nuestra investigación universitaria.**

1. ¿Donde trabaja usted? (más de una opción son posibles)

- ☐ - hospital publico
- ☐ - hospital privado
- ☐ - Centros de salud
- ☐ - Medicos particulares
- ☐ Otro(precisar)

2. ¿Es usted?

- ☐ - Ginecólogo
- ☐ - Generalista
- ☐ - Enfermera
- ☐ - Auxiliar de enfermera
- ☐ - Bioquímico
- ☐ - Otro (precisar)

3. ¿usted recibido una formación específica sobre la infección y detección del Virus del Papilloma Humano (VPH)?

- ☐ - si
- ☐ - no

4. ¿Informa usted a sus pacientes del riesgo de la infección por el VPH y su relación con el cáncer cervical (CC)?

- ☐ - Si
- ☐ - No

5. ¿Qué medio utiliza usted para despistar el VPH a sus pacientes? (más de una opción es posible)

- ☐ - Test de HPV
- ☐ - Papanicolaou
- ☐ - Inspección visual al ácido acético (IVAA)
- ☐ - Colposcopia
- ☐ - Biopsia
- ☐ - estudio histopatológico
- ☐ - Yo no estoy habilitada/habilitado para hacerlo
- ☐ Otro(precisar)

6. ¿Ha tenido usted algún problema/problemas para despistar a sus pacientes? Si si, cuales (más de una elección)

- ☐ - Costo del test
- ☐ - Falta de material para realizarlo
- ☐ - Yo no tengo la capacidad de hacerlo
- ☐ - Sobrecarga de trabajo
- ☐ - Falta de personal
- ☐ - Marido/familia de la paciente que impide la paciente de venir
- ☐ - Ninguna barrera ha sido encontrada
- ☐ Otro(precisar)

7. ¿Como anuncia usted los resultados del despistaje VPH a sus pacientes? (más de una elección)

- |                                                      |                                                                                                          |
|------------------------------------------------------|----------------------------------------------------------------------------------------------------------|
| <input type="checkbox"/> - Por llamada telefónica    | <input type="checkbox"/> - Via una promotora                                                             |
| <input type="checkbox"/> - Por correo                | <input type="checkbox"/> - Espero que la paciente venga a verme                                          |
| <input type="checkbox"/> - Via el médico generalista | <input type="checkbox"/> - Le pido a un colega de hacerlo                                                |
| <input type="checkbox"/> - Via el ginecólogo         | <input type="checkbox"/> - Si la paciente utiliza la autotoma, ella vendrá hacia mi según los resultados |
| <input type="checkbox"/> Otro(precisar)              |                                                                                                          |

8. ¿Verifica usted los resultados antes de escoger el tipo de tratamiento para el VPH para la paciente?

- ☐ - Si
- ☐ - No
- ☐ - Eso no me concierne

9. ¿A tenido usted problemas para realizar el seguimiento/ tratamiento de sus pacientes? Si si, cuáles?  
(más de una opción son posibles)

- ☐ - Costo del test
- ☐ - Falta de material
- ☐ - Falta de capacidad
- ☐ - Sobrecarga de trabajo
- ☐ - Falta de personal
- ☐ - Marido/familia de la paciente que impide las pacientes de venir
- ☐ - No, ningún problema ha sido encontrado
- ☐ Otro(precisar)

10. ¿Verifica usted a que estado de VPH la paciente se encuentra antes de entamar un tratamiento?

- ☐ - Si, siempre
- ☐ - Si, cuando es posible
- ☐ - Non
- ☐ - No pienso que eso sea necesario para tomar una decisión

11. ¿Da usted alguna explicación concerniente al seguimiento/tratamiento?

- |                                                                |                                                           |
|----------------------------------------------------------------|-----------------------------------------------------------|
| <input type="radio"/> - Si                                     | <input type="radio"/> - Mis colegas dan las explicaciones |
| <input type="radio"/> - Si, y verifico su nivel de comprensión | <input type="radio"/> - No se aplica a mi función         |
| <input type="radio"/> - No                                     |                                                           |

12. ¿Qué tipo de seguimiento/tratamiento que propone usted si las lesiones del cuello uterino son benignas? (más de una opción es posible)

- ☐ - Histerectomía
- ☐ - Crioterapia
- ☐ - Conización
- ☐ - Medicamentos
- ☐ - Ninguno
- ☐ Otro(precisar)

13. ¿Qué tipo de seguimiento/tratamiento propone usted si las lesiones son invasivas? (más de una opción es posible)

- ☐ - Histerectomía
- ☐ - Crioterapia
- ☐ - Conización
- ☐ - Medicamentos
- ☐ - Ninguno
- ☐ Otro(precisar)

14. ¿ Que tipo de seguimiento/ tratamiento propone usted si usted no está seguro de los resultados?

- ☐ - - Histerectomía
- ☐ - Crioterapia
- ☐ - Conización
- ☐ Otro(precisar)
- ☐ - Medicamentos
- ☐ - Ninguno

15. ¿Si la paciente no está de acuerdo con el seguimiento/ tratamiento propuesto, que le propone usted?

- |                                                                         |                                                                                  |
|-------------------------------------------------------------------------|----------------------------------------------------------------------------------|
| <input type="radio"/> - Reexplica para convencerla                      | <input type="radio"/> - La transfiere a un otro profesional de salud             |
| <input type="radio"/> - Acepta su decisión y pide una nueva cita        | <input type="radio"/> - No le doy la opción de rechazar, es lo que hay que hacer |
| <input type="radio"/> - Acepta su decisión, ella volverá si lo necesita | <input type="radio"/> - Nunca estuve frente a ese tipo de situación              |
| <input type="radio"/> - Acepta su decisión sin cuestionarse             |                                                                                  |
| <input type="radio"/> - Otro (precisar)                                 |                                                                                  |

16. ¿Piensa usted que las mujeres prefieren ir donde los practicantes tradicionales (yatiri, naturista, curandero...)?

- ☐ - Si
- ☐ - No
- ☐ - No se

17. ¿Estaría usted dispuesto a trabajar en colaboración con un practicante tradicional?

- |                                                    |                                                   |
|----------------------------------------------------|---------------------------------------------------|
| <input type="radio"/> - Si, actualmente ya lo hago | <input type="radio"/> - No, no encuentro eso útil |
| <input type="radio"/> - Si, si eso puede ayudar    | <input type="radio"/> - No lo se                  |
| <input type="radio"/> - No, prefiero que no        |                                                   |

18. ¿Trabajó usted con el proyecto VPH con la UMSS?

- ☐ - Si
- ☐ - no

19. ¿Tiene usted algunos comentarios sobre el seguimiento/tratamiento y /o el procedimiento de despistaje VPH?
