# Supplementary material for: Assessing Barriers Encountered by Women in Cervical Cancer Screening and Follow-Up Care in Urban Bolivia, Cochabamba
Source: MDPI journal article supplement (doi:10.3390/healthcare10091604), 2022-08-24
Supplement: s1 [file s1]

**Figure S1:** Covered municipalities including delimitation of provinces in the department of Cochabamba

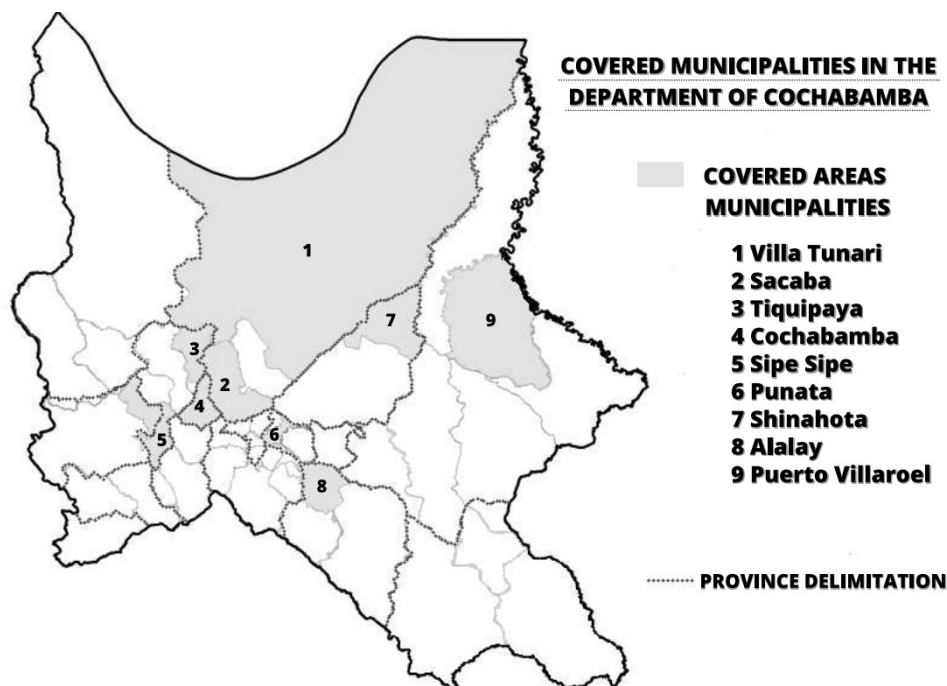

**Table S1:** Covered geographical areas

| Municipality      | Province    |
|-------------------|-------------|
| Puerto Villarroel | Carrasco    |
| Cochabamba        | Cercado     |
| Sacaba            | Chapare     |
| Villa Tunari      | Chapare     |
| Alalay            | Mizque      |
| Punata            | Punata      |
| Sipe Sipe         | Quillacollo |
| Tiquipaya         | Quillacollo |
| Shinahota         | Tiraque     |

**Table S2:** Interviewed healthcare professionals

| Subject            | Profession          | Geographical area               | Participation in the pilot project | Municipality |
|--------------------|---------------------|---------------------------------|------------------------------------|--------------|
| HCP#1              | Doctor gynecologist | Hospital Viedma                 | Yes                                | Cochabamba   |
| HCP#2              | Doctor generalist   | Hospital Chipiriri (Tropico)    | yes                                | Villa Tunari |
| HCP#3              | Doctor Gynecologist | Hospital Ibuelo (Tropico)       | yes                                | Villa Tunari |
| HCP#4 <sup>#</sup> | Nurse               | Hospital Villa Tunari (Tropico) | yes                                | Villa Tunari |
| HCP#5              | Nurse               | Hospital Chipiriri (Tropico)    | yes                                | Villa Tunari |
| HCP#6              | Chemist             | Pucarita                        | yes                                | Cochabamba   |
| HCP#7              | Nurse               | Villa Tunari (Tropico)          | No*                                | Villa Tunari |

|        |                     |                     |     |              |
|--------|---------------------|---------------------|-----|--------------|
| HCP#8  | Doctor generalist   | Chipiriri (Tropico) | Yes | Villa Tunari |
| HCP#9  | Doctor gynecologist | Cercado             | Yes | Cochabamba   |
| HCP#10 | Nurse               | Cercado             | Yes | Cochabamba   |

\*She collaborated, \*Health provider and patient, she completed both questionnaires

**Table S3:** Interviewed female patients

| Subject  | occupation    | Geographical area where the interview take place                     | Municipality     |
|----------|---------------|----------------------------------------------------------------------|------------------|
| Woman#1  | Merchantwoman | Punata                                                               | Punata           |
| Woman#2  | /             | Sipe Sipe                                                            | Sipe Sipe        |
| Woman#3  | Merchantwoman | Punata                                                               | Punata           |
| Woman#4  | Merchantwoman | Interviewed at the health centrum of Sipe Sipe but lived in Parotani | Sipe Sipe        |
| Woman#5  | Dressmaker    | Cercado                                                              | Cochabamba       |
| Woman#6  | Dentist       | Cercado - interviewed by phone                                       | Cochabamba       |
| Woman#7  | /             | Villa Tunari (Tropico) - interviewed by phone                        | Villa Tunari     |
| Woman#8  | /             | Used to live in Tropico moved to Chili - interviewed by phone        | Villa Tunari     |
| Woman#9  | Unemployed    | Ivirgarzama - interviewed by phone                                   | Puerto Villaroel |
| Woman#10 | /             | Alalay -interviewed by phone                                         | Alalay           |
| Woman#11 | Housewife     | Shinaota -interviewed by Phone                                       | Shinaota         |
| Woman#12 | Merchantwoman | Punata                                                               | Punata           |
| Woman#13 | Orthodontist  | Punata -interviewed by phone                                         | Punata           |
| Woman#14 | HCP           | Cercado                                                              | Cochabamba       |
| Woman#15 | Housewife     | Punata                                                               | Punata           |

**Table S4:** Interviewed health promoters/promotoras

| Subject     | Occupation       | Geographical area where the interview take place | Municipality |
|-------------|------------------|--------------------------------------------------|--------------|
| Promotora#1 | Self-employed    | Sipe Sipe                                        | Sipe Sipe    |
| Promotora#2 | /                | Cercado                                          | Cochabamba   |
| Promotora#3 | Accountant       | Punata                                           | Cochabamba   |
| Promotora#4 | Community leader | Sipe Sipe                                        | Sipe Sipe    |

**Table S5:** Interviewed medical care settings chosen by women

|                                | <b>% General Check-up (N=244)</b> | <b>% Gynecological Check-up (N=244)</b> |
|--------------------------------|-----------------------------------|-----------------------------------------|
| Public hospital                | 32.38                             | 26.23                                   |
| Caja de salud                  | 4.1                               | 2.05                                    |
| General practitioner           | 11.46                             | 0                                       |
| Health centers                 | 15.98                             | 14.75                                   |
| Private hospital               | 24.59                             | 27.05                                   |
| Traditional practitioner       | 0.41                              | 0                                       |
| Follow-up within pilot project | 0                                 | 0.41                                    |
| No check-up                    | 11.07                             | 18.03                                   |

**Table S6:** Means of announcing the results

|                                       | <b>HCPs (% , N=36)</b> | <b>Women (% , N=48)</b> |
|---------------------------------------|------------------------|-------------------------|
| Phone calls                           | 19.44                  | 14.58                   |
| Letters                               | 0                      | 0                       |
| Via general practitioner              | 27.77                  | 27.08                   |
| Via gynecologist                      | 19.44                  | 31.25                   |
| Via a promotora (pilot project)       | 0                      | 8.33                    |
| When patient comes for a consultation | 50                     | 0                       |
| At the patient's home                 | 5.56                   | 0                       |
| No results were received              | 0                      | 10.42                   |
| Via medical laboratory                | 0                      | 8.33                    |
| Direct personal contact               | 8.33                   | 0                       |

\* Respondents could select multiple choices.
