# Supplementary material for: Assessing Barriers Encountered by Women in Cervical Cancer Screening and Follow-Up Care in Urban Bolivia, Cochabamba
Source: MDPI journal article supplement (doi:10.3390/healthcare10091604), 2022-08-24
Supplement: s1 [file s1]

---

## Guía de entrevista para mujeres VPH+

---

### Introducción:

Buenos días, en el marco de un estudio realizado en colaboración entre la Universidad Libre de Bruselas y la Universidad Mayor San Simón, estamos interesados en la detección y el control del VPH de las mujeres diagnosticadas con una infección.

Todo lo que será discutido aquí es completamente confidencial y anónimo (datos anonimizados)

La entrevista dura aproximadamente de 30 minutos. ¿Aceptaría participar? ¿Podríamos preguntarle también si no tiene problema con el hecho que grabemos la entrevista? → la grabación será únicamente utilizada para nuestro análisis y será destruida luego de esto.

Sepa por favor que puede finalizar esta entrevista en cualquier momento y también que puede no responder algunas preguntas que puedan hacerle sentir incómodo/a.

|                                                     |                                                                                                                                                                                                                                                                                                                                                                                                                                                                                                                                                                                                                                                 |
|-----------------------------------------------------|-------------------------------------------------------------------------------------------------------------------------------------------------------------------------------------------------------------------------------------------------------------------------------------------------------------------------------------------------------------------------------------------------------------------------------------------------------------------------------------------------------------------------------------------------------------------------------------------------------------------------------------------------|
| Preguntas demográficas                              | <ol style="list-style-type: none"><li>1.Cuál es su nombre?</li><li>2.Cuántos años tiene?</li><li>3.Dónde vive? en esta comunidad o en otra?</li><li>4.Cuantos hijos tiene? cual es la edad del mayor y del menor?</li><li>5.Cuál es su estado civil?</li><li>6.Ha que se dedica usted?</li><li>7.En qué lugar hace sus consultas médicas?<u>a qué distancia se encuentra? ¿No hay otro más cercano?</u></li><li>8.En su último embarazo qué pruebas le realizaron?</li></ol>                                                                                                                                                                    |
| Caracterizar la información que conocen las mujeres | <ol style="list-style-type: none"><li>1.¿Qué sabe usted sobre el virus de papiloma humano? sobre su transmisión y riesgos?</li><li>2.¿Cómo obtuvo usted esa información?</li><li>3.¿De esa información que usted tiene del VPH que le es difícil entender?</li><li>4.Recibió alguna explicación sobre el tratamiento que debe seguir</li><li>5.Hay algo que no entendió sobre la explicación y/o tiene alguna duda sobre la infección o tratamiento a seguir?</li><li>6.Cuáles cree usted que son las consecuencias si no sigue el tratamiento</li><li>7.Qué es lo que más le preocupa o asusta del tratamiento que tiene que seguir?</li></ol> |
| Observar cómo se realiza el anuncio del diagnóstico | <ol style="list-style-type: none"><li>1.En los últimos 3 años asistió usted al ginecólogo? cuantas veces? Y cuando fue su último PAP?(Le realizaron otras pruebas, VIH, otras)</li><li>2 Usted se realizo una auto toma, que le parece este procedimiento?</li><li>3.Qué pruebas se realizó? Pap/hiv/Auto toma y cuando fue la última vez</li><li>4.Ha recibido usted los resultados de VPH</li></ol>                                                                                                                                                                                                                                           |

|                                                                                                                                                            |                                                                                                                                                                                                                                                                                                                                                                                                                                                                                                                                                                                                                           |
|------------------------------------------------------------------------------------------------------------------------------------------------------------|---------------------------------------------------------------------------------------------------------------------------------------------------------------------------------------------------------------------------------------------------------------------------------------------------------------------------------------------------------------------------------------------------------------------------------------------------------------------------------------------------------------------------------------------------------------------------------------------------------------------------|
|                                                                                                                                                            | <p>5. Cuánto tiempo demoraron los resultados, cómo recibió? y Quien se los entregó?</p> <p>6. Qué información se le proporcionó cuando recibió los resultados? como?</p> <p>7. Le han dicho que pasos debe usted seguir ó qué debe hacer</p> <p>8. Seguiría usted esos pasos ?</p> <p>9. Ha programado una cita después de recibir los resultados</p> <p>10. Si es SI ¿como lo hizo? si es NO ¿que le impidió hacerlo?</p> <p>11. Que tendría que pasar para que usted vaya al médico para hacer su tratamiento</p> <p>12. Estaría de acuerdo que el laboratorio le comunique por teléfono los resultados.</p>            |
| Identificar problemas, dificultades y aciertos para la atención de salud de las mujeres (empatía/apatía/interés o no? entorno social, aspectos culturales) | <p>1. En caso de una urgencia de salud tiene alguna dificultad para conseguir atención médica?</p> <p>2. Cuales son sus principales dificultades para asistir al Médico/ginecólogo? (Tiempo, dinero, transporten trabajo, ayuda con los hijos)</p> <p>3. Conoce usted el costo del tratamiento, le ha faltado dinero para pagar analisis/medicinas que le pidio el medico</p> <p>4. En el último año ha ido mas veces al medico por la salud de su familia o por la de usted?</p>                                                                                                                                         |
| Opinión del entorno social y pareja                                                                                                                        | <p>-Ha hablando de sus resultados con algunos familiares o con amigas? Si es si, que le han dicho? si es no, le preocupa que sus familiares y amigas se enteren de sus resultados?</p> <p>-EL pensamiento (de familiares y amig@s) importa para que usted siga el tratamiento le hace cambiar su actitud de seguir el tratamiento y volver a ver al médico?</p> <p>-Eso le impide ir al médico ?</p> <p>-Ha hablado de su resultado HPV+ con su pareja? si es si, que piensa el al respecto? le ha traído alguna dificultad saber el resultado (HPV+) ha cambiado la relación con su pareja?</p>                          |
| medicina tradicional y religion                                                                                                                            | <p>1. ha buscado alguna vez a un curandero, yatiri, partera, médico tradicional? y por un tratamiento para el virus? Pq? si es si; confía usted en el/ella?</p> <p>2. Cree que él/ ella podría curarle de una infección al HPV+</p> <p>3. El médico tradicional le recomendo algun tratamiento? cual?</p> <p>4. Si el curandero, yatiri, partera, médico tradicional estuviera con el ginecólogo en la consulta usted haría el tratamiento?</p> <p>6. Asiste usted a alguna iglesia? desde cuando?</p> <p>7. Cree usted que su fé le podría sanar de una infección de HPV?</p> <p>8 hay algo que le gustaría agregar?</p> |

---

**Guía de entrevista para médicos, promotoras de salud y otros  
profesionales**

---

**Introducción:**

Buenos días, en el marco de un estudio realizado en colaboración entre la Universidad Libre de Bruselas y la Universidad Mayor San Simón, estamos interesados en la detección y el control del VPH de las mujeres diagnosticadas con una infección.

Todo lo que será discutido aquí es completamente confidencial y anónimo (datos anonimizados)

La entrevista dura aproximadamente de 30 minutos. ¿Aceptaría participar? ¿Podríamos preguntarle también si no tiene problema con el hecho que grabemos la entrevista? → la grabación será únicamente utilizada para nuestro análisis y será destruida luego de esto.

Sepa por favor que puede finalizar esta entrevista en cualquier momento y también que puede no responder algunas preguntas que puedan hacerle sentir incómodo/a.

| objetivos                                                      | preguntas                                                                                                                                                                                                                                                                                                                                                                                                                                                                                                                                                                                                                           |
|----------------------------------------------------------------|-------------------------------------------------------------------------------------------------------------------------------------------------------------------------------------------------------------------------------------------------------------------------------------------------------------------------------------------------------------------------------------------------------------------------------------------------------------------------------------------------------------------------------------------------------------------------------------------------------------------------------------|
| observar cómo se realiza el anuncio del diagnóstico            | <ol style="list-style-type: none"><li>1. Cual es su profesión/cargo en el proyecto?</li><li>2. hace cuanto tiempo ejerce su profesión/cargo.</li><li>3. Puede usted relatar la manera como se entregan los resultados HPV+ a las mujeres?</li><li>4. Qué consideraciones precauciones y otros se tiene para entregar los resultados HPV+</li><li>5. Existen estándares de procedimiento? de explicación del resultado?</li><li>6. Luego de la entrega de resultados que pasos debe seguir la paciente?</li></ol>                                                                                                                    |
| caracterizar la información que conocen las mujeres sobre VPH+ | <ol style="list-style-type: none"><li>1. sabe usted dónde se informan las mujeres sobre el VPH?</li><li>2. en el centro de salud o la consulta se da información sobre VPH a las mujeres (publico en general) (si es si)</li><li>3. cuales son las principales ideas que se transmite a las mujeres sobre el VPH?</li><li>4. se dan consejos de prevención de infecciones de transmisión sexual a las mujeres? cuales?</li><li>5. Se ha realizado usted la autotoma ? qué sensación le produjo aprender los resultados ?</li><li>6. Qué es lo que usted piensa en su calidad de promotora y de mujer sobre la infección ?</li></ol> |

|                                                                                                                                   |                                                                                                                                                                                                                                                                                                                                                                                                                                                                                                                                                                                                                                                                                                                        |
|-----------------------------------------------------------------------------------------------------------------------------------|------------------------------------------------------------------------------------------------------------------------------------------------------------------------------------------------------------------------------------------------------------------------------------------------------------------------------------------------------------------------------------------------------------------------------------------------------------------------------------------------------------------------------------------------------------------------------------------------------------------------------------------------------------------------------------------------------------------------|
|                                                                                                                                   |                                                                                                                                                                                                                                                                                                                                                                                                                                                                                                                                                                                                                                                                                                                        |
| Tratamiento                                                                                                                       | <ol style="list-style-type: none"> <li>1. Como se explica a las mujeres el tratamiento a seguir (ideas claves para explicar el tratamiento a seguir)</li> <li>2. de lo que usted ha observado, que es lo que mas les cuesta comprender a las mujeres sobre el tratamiento?</li> <li>3. que ha escuchado usted de las mujeres sobre sus resultados (VPH+, reacciones, consideraciones, preguntas, preocupaciones y otros)</li> </ol>                                                                                                                                                                                                                                                                                    |
| identificar problemas, dificultades, aciertos en la relación profesional de salud con las mujeres (empatía/ apatía/ interés o no) | <ol style="list-style-type: none"> <li>1. según su opinión, cuáles son las razones por las cuales las mujeres que han sido diagnosticadas con el VPH+ no vienen al seguimiento?</li> <li>2. que razones de orden personal u otras indican las mujeres para no asistir a su tratamiento?</li> <li>3. que tienen en común las mujeres que no vuelven a su seguimiento médico?</li> <li>4. que tienen en común las mujeres que realizan su seguimiento y tratamiento médico?</li> <li>5. en su experiencia, qué estrategias utilizadas le ha dado mejor resultado para convencer a las mujeres de seguir su tratamiento médico?</li> <li>6. que cosas cree que necesita para hacer más eficiente este trabajo?</li> </ol> |
| medicina tradicional (curandero, partera, yatiri, jampiri)                                                                        | <ol style="list-style-type: none"> <li>1. sabe usted si las mujeres acuden más a los practicantes de "medicina tradicional" que a los servicios de salud?</li> <li>2. ha escuchado o conoce de algun tratamiento que hubiera implementado la "medicina tradicional" para esta infección VPH?</li> <li>3. ha tenido alguna experiencia de trabajar colaborativamente con practicantes de medicina tradicional?</li> <li>4. si se presentara la oportunidad estaría dispuesto a trabajar con ellos colaborativamente?</li> <li>5. y que de alguna iglesia?</li> </ol>                                                                                                                                                    |
