# Supplementary material for: Assessing Barriers Encountered by Women in Cervical Cancer Screening and Follow-Up Care in Urban Bolivia, Cochabamba
Source: MDPI journal article supplement (doi:10.3390/healthcare10091604), 2022-08-24
Supplement: s1 [file s1]

**En el marco de un estudio realizado en cooperación entre la Universidad Libre de Bruselas y la Universidad Mayor de San Simon, estamos realizando un estudio, con el objetivo de aumentar los conocimientos sobre la experiencia que tienen las mujeres en torno al Virus del Papiloma Humano. Los resultados obtenidos en este estudio servirán a mejorar la comunicación entre las pacientes y el personal de salud, de mismo que el seguimiento propuesto por el personal de salud a las pacientes.**

**Todas las informaciones dadas en este cuestionario serán completamente anónimas, confidenciales y utilizadas únicamente en el marco de nuestra investigación universitaria.**

1. ¿Cuál es su edad?

- ☐ - Entre 15-20 años
- ☐ - Entre 21-35 años
- ☐ - Entre 36-50 años
- ☐ - Mas de 50 años

2. ¿Qué tipo de estudios ha hecho?

- ☐ - Primaria/basico
- ☐ - No termine la primaria/basico
- ☐ - Secundaria/bachiller
- ☐ - No termine la secundaria/bachiller
- ☐ - Formacion tecnica
- ☐ - Universidad
- ☐ - Ninguno

3. ¿Donde hace usted su chequeo/control médico generalmente?

- ☐ - Hospital publico
- ☐ - Hospital privado
- ☐ - Centros de salud
- ☐ - Caja de salud
- ☐ Otro (precisar)
- ☐ - Médicos particulares
- ☐ - Practicantes tradicionales (curanderos, yatiris, naturista, brujo...)
- ☐ - No hago ningún chequeo/control

4. ¿Donde hace usted su chequeo/control ginecológico?

- |                                          |                                                                                               |
|------------------------------------------|-----------------------------------------------------------------------------------------------|
| <input type="radio"/> - Hospital publico | <input type="radio"/> - Médicos particulares o mi medico                                      |
| <input type="radio"/> - Hospital privado | <input type="radio"/> - Hago mi seguimiento con el ginecólogo del proyecto                    |
| <input type="radio"/> - Centros de salud | <input type="radio"/> - Practicantes tradicionales (curanderos, yatiris, naturista, brujo...) |
| <input type="radio"/> - Caja de salud    | <input type="radio"/> - No hago ningún chequeo/control                                        |
| <input type="radio"/> Otro (precisar)    |                                                                                               |

5. ¿Ha escuchado hablar del Virus del Papiloma Humano (VPH)?

- ☐ - si
- ☐ - no

6. Si la respuesta a la pregunta anterior fue si, ¿cómo se ha usted informado?

- |                                                                                 |                                                                            |
|---------------------------------------------------------------------------------|----------------------------------------------------------------------------|
| <input type="radio"/> - He buscado sola la información                          | <input type="radio"/> - Me he informado por medio de mi médico generalista |
| <input type="radio"/> - Me informé por medio de alguna persona cercana a mi     | <input type="radio"/> - Me he informado por medio de mi ginecólogo         |
| <input type="radio"/> - Me he informado por medio de los medios de comunicación | <input type="radio"/> - Me informé por medio de una promotora              |

7. ¿Se ha realizado el test del Virus del Papilloma Humano (VPH)?

- |                                                               |                                                                   |
|---------------------------------------------------------------|-------------------------------------------------------------------|
| <input type="radio"/> - Si, lo hice                           | <input type="radio"/> - No, pienso que eso no me concierne        |
| <input type="radio"/> - No, no lo hare nunca                  | <input type="radio"/> - No, el test me da miedo                   |
| <input type="radio"/> - Pienso hacer el despistaje muy pronto | <input type="radio"/> - No, conocer los resultados me daría miedo |
| <input type="radio"/> - No, me interesa hacerlo               |                                                                   |

8. ¿Piensa usted que hay algún tipo de problemas/dificultad para acceder al test de despistaje? (más de una opción son posibles)

- |                                                                                |                                                                                      |
|--------------------------------------------------------------------------------|--------------------------------------------------------------------------------------|
| <input type="checkbox"/> - Costo del test                                      | <input type="checkbox"/> - Mi marido/familia me impide hacer los test                |
| <input type="checkbox"/> - Costo del transporte para acceder al lugar del test | <input type="checkbox"/> - El tiempo de espera de las citas                          |
| <input type="checkbox"/> - Distancia para acceder al lugar del test            | <input type="checkbox"/> - La dificultad de liberarme del trabajo                    |
| <input type="checkbox"/> - Actitud del personal de salud                       | <input type="checkbox"/> - La dificultad de liberarme de mis obligaciones familiares |
| <input type="checkbox"/> - El personal de salud no me explico bien             | <input type="checkbox"/> - Ningún problema ha sido encontrado.                       |

\* 9. ¿ha hecho usted el test del Virus Papiloma Humano(VPH)?

☐ Si

☐ No

**Si usted no ha hecho el test, no necesita responder a las siguientes preguntas**

\* 10. ¿Como se hizo el test de VPH?

- ☐ - Autotoma
- ☐ - Test realizado por el ginecólogo/personal de salud
- ☐ - Test realizado durante el Papanicolau
- ☐ - Yo no se
- ☐ - Otro (precisar)

\* 11. ¿Como recibió usted los resultados?

- ☐ - Por llamada telefónica
- ☐ - Por correo en mi casa
- ☐ - Mediante el médico generalista
- ☐ - Mediante mi ginecologo
- ☐ - Otro (precisar)
- ☐ - Via una promotora
- ☐ - Via el laboratorio
- ☐ - No he recibido ningún resultado del test

12. ¿Como le hubiera gustado a usted recibir los resultados? (más de una elección)

- ☐ - Por llamada telefónica
- ☐ - Por correo en mi casa
- ☐ - Mediante mi medico generalista
- ☐ - Otro (precisar)
- ☐ - Mediante mi ginecologo
- ☐ - Via una promotora
- ☐ - Via el laboratorio

13. Si usted tuviera resultados positivos, ¿ que preferiría usted?

- ☐ - Hacer su seguimiento con un practicante tradicional (yatiri, curandero, naturista...)
- ☐ - Hacer su seguimiento con el medico
- ☐ - Hacer su seguimiento con el medico en colaboración con un practicante tradicional también
- ☐ - Ninguno
- ☐ - No lo se

\* 14. ¿Cuál ha sido el resultado?

☐ - Positivo

☐ - Negativo

☐ - Aun no lo se/ No estoy segura

☐ - Un nuevo test debe ser realizado

☐ - No quiero dar mi resultado

**Si su resultado ha sido negativo o que usted no recibió los resultados, no es necesario de responder a las siguientes preguntas**

\* 15. ¿Ha recibido usted los resultados del test de VPH o Papanicolau antes de la proposición de un seguimiento/tratamiento?

- |                                                                      |                                                                      |
|----------------------------------------------------------------------|----------------------------------------------------------------------|
| <input type="radio"/> - Si                                           | <input type="radio"/> - No, y No hago ningun seguimiento/tratamiento |
| <input type="radio"/> - Si, y No hago ningun seguimiento/tratamiento | <input type="radio"/> - No quiero compartir esta informacion         |
| <input type="radio"/> - No                                           |                                                                      |

\* 16. ¿Dónde hace usted su seguimiento/tratamiento del VPH?

- |                                          |                                                                                               |
|------------------------------------------|-----------------------------------------------------------------------------------------------|
| <input type="radio"/> - Hospital publico | <input type="radio"/> - Médicos particulares o mi medico                                      |
| <input type="radio"/> - Hospital privado | <input type="radio"/> - Hago mi seguimiento con el ginecólogo del proyecto                    |
| <input type="radio"/> - Centros de salud | <input type="radio"/> - Practicantes tradicionales (curanderos, yatiris, naturista, brujo...) |
| <input type="radio"/> - Caja de salud    | <input type="radio"/> - No hago ningun seguimiento/tratamiento                                |
| <input type="radio"/> Otro (precisar)    |                                                                                               |

\* 17. ¿Tuvo usted algún tipo de problemas para acceder al seguimiento/tratamiento? (más de una opción son posibles)

- |                                                                                |                                                                                      |
|--------------------------------------------------------------------------------|--------------------------------------------------------------------------------------|
| <input type="checkbox"/> - Costo del tratamiento/seguimiento                   | <input type="checkbox"/> - El tiempo de espera de las citas                          |
| <input type="checkbox"/> - Costo del transporte para acceder al lugar del test | <input type="checkbox"/> - La dificultad de liberarme del trabajo                    |
| <input type="checkbox"/> - Distancia para acceder al lugar del test            | <input type="checkbox"/> - La dificultad de liberarme de mis obligaciones familiares |
| <input type="checkbox"/> - Actitud del personal de salud                       | <input type="checkbox"/> - Ningún problema ha sido encontrado.                       |
| <input type="checkbox"/> - Explicación insuficiente del personal de salud      | <input type="checkbox"/> - No quiero compartir esta informacion                      |
| <input type="checkbox"/> - Mi marido/familia me impide hacer los test          | <input type="checkbox"/> - Eso no me concierne                                       |

\* 18. ¿Qué le dijo el médico después de darle los resultados positivos de VPH y la inspección?

- |                                                              |                                                                      |
|--------------------------------------------------------------|----------------------------------------------------------------------|
| <input type="radio"/> - No hay ningún problema               | <input type="radio"/> - El doctor no me explico nada                 |
| <input type="radio"/> - Usted tiene lesiones benignas        | <input type="radio"/> - El doctor me explico pero no le entendi bien |
| <input type="radio"/> - Usted tiene lesiones graves          | <input type="radio"/> - No quiero compartir esta informacion         |
| <input type="radio"/> - Usted tiene un problema de infección | <input type="radio"/> - Necesita hacer otros exámenes/control        |
| <input type="radio"/> - Yo no se/ No estoy segura            |                                                                      |

19. ¿Qué tipo de seguimiento/tratamiento le han propuesto a usted?

- |                                                                            |                                                                             |
|----------------------------------------------------------------------------|-----------------------------------------------------------------------------|
| <input type="radio"/> - Histerectomía (retiramiento del útero o la matriz) | <input type="radio"/> - No quiero compartir esta informacion                |
| <input type="radio"/> - Crioterapia/ Quemar la lesión                      | <input type="radio"/> - Yo no se, el doctor no me explico bien              |
| <input type="radio"/> - Medicamentos                                       | <input type="radio"/> - Yo no se, el doctor me explico pero no entendi bien |
| <input type="radio"/> - Aun estoy esperando los resultados de los exámenes |                                                                             |
| <input type="radio"/> - Otro (precisar)                                    |                                                                             |

\* 20. ¿Recibió usted una explicación concerniendo el seguimiento/tratamiento del VPH?

- |                                                               |                                                              |
|---------------------------------------------------------------|--------------------------------------------------------------|
| <input type="radio"/> - Sí, y lo entendí                      | <input type="radio"/> - No me interesa                       |
| <input type="radio"/> - Sí, pero no entendí las explicaciones | <input type="radio"/> - No quiero compartir esta informacion |
| <input type="radio"/> - No                                    |                                                              |

\* 21. ¿Está usted de acuerdo con lo que le propusieron?

- |                                                                                                         |                                                                          |
|---------------------------------------------------------------------------------------------------------|--------------------------------------------------------------------------|
| <input type="radio"/> - Sí, porque me lo explicaron todo                                                | <input type="radio"/> - No, y no pretendo seguir lo que me han prescrito |
| <input type="radio"/> - Sí, porque hago confianza a mi medico                                           | <input type="radio"/> - No se aun                                        |
| <input type="radio"/> - Si pero no tengo los medios financieros de seguir mi tratamiento/mi terapia     | <input type="radio"/> - Eso no me concierne                              |
| <input type="radio"/> - Sí, pero mi marido/mi familia no me permite de seguir mi tratamiento/mi terapia | <input type="radio"/> - No quiero compartir esta informacion             |
| <input type="radio"/> - No, pero el médico debe tener razón/sabe lo que hace                            |                                                                          |

Comentarios

22. ¿ Tiene usted algunos comentarios sobre el seguimiento/tratamiento y/o el procedimiento de despistaje VPH?
