# Supplementary material for: Assessing Barriers Encountered by Women in Cervical Cancer Screening and Follow-Up Care in Urban Bolivia, Cochabamba
Source: Healthcare (Basel). 2022 Aug 24;10(9):1604. doi: 10.3390/healthcare10091604 (PMC9498362; doi:10.3390/healthcare10091604)
Supplement: Supplementary file 1 [file healthcare-10-01604-s001.zip]

Archive with 4 entries (4 files):
- Supplementary Material File S1.pdf
- Supplementary Material File S2.pdf
- Supplementary Material File S3.pdf
- Supplementary Material File S4.pdf
